# Supplementary material for: Cancer signature ensemble integrating cfDNA methylation, copy number, and fragmentation facilitates multi-cancer early detection
Source: PubMed Central journal article supplement (PMC10689759; doi:10.1038/s12276-023-01119-5), 2023-11-01
Supplement: 12276_2023_1119_MOESM1_ESM.pdf [file 12276_2023_1119_MOESM1_ESM.pdf]

1  
2  
3  
4  
5  
6  
7  
8  
9  
10  
11  
12  
13  
14  
15  
16  
17  
18  
19  
20  
21  
22  
23

# Supplementary Data

## **Cancer signature ensemble integrating cfDNA methylation, copy number, and fragmentation facilitates multi-cancer early detection**

Su Yeon Kim *et al.*

\* Corresponding author. Email: duheebang@yonsei.ac.kr (D.B.); kimty@snu.ac.kr (T.-Y.K.)

### **This PDF file includes:**

Supplementary Figs. 1 to 20

### **Other Supplementary Data for this manuscript include the following:**

Supplementary Tables 1 to 3

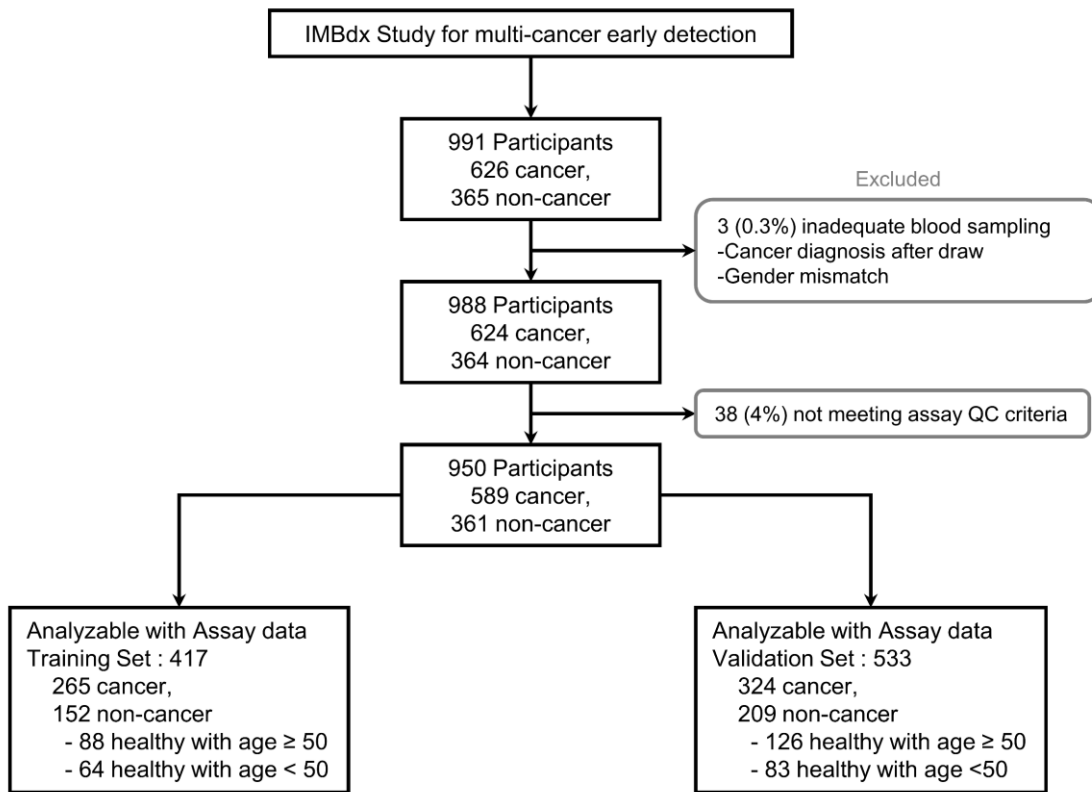

24

25 **Supplementary Fig. 1. AlphaLiquid® Screening study.**

26 Data from 991 participants were collected, including 626 cancer patients and 365 healthy  
 27 controls. Three participants were excluded due to inadequate blood sampling and an additional 38  
 28 samples were filtered out by assay quality control (QC) criteria. The remaining participants were  
 29 divided into training (n=417) and test (n=533) sets for machine learning.

30

31

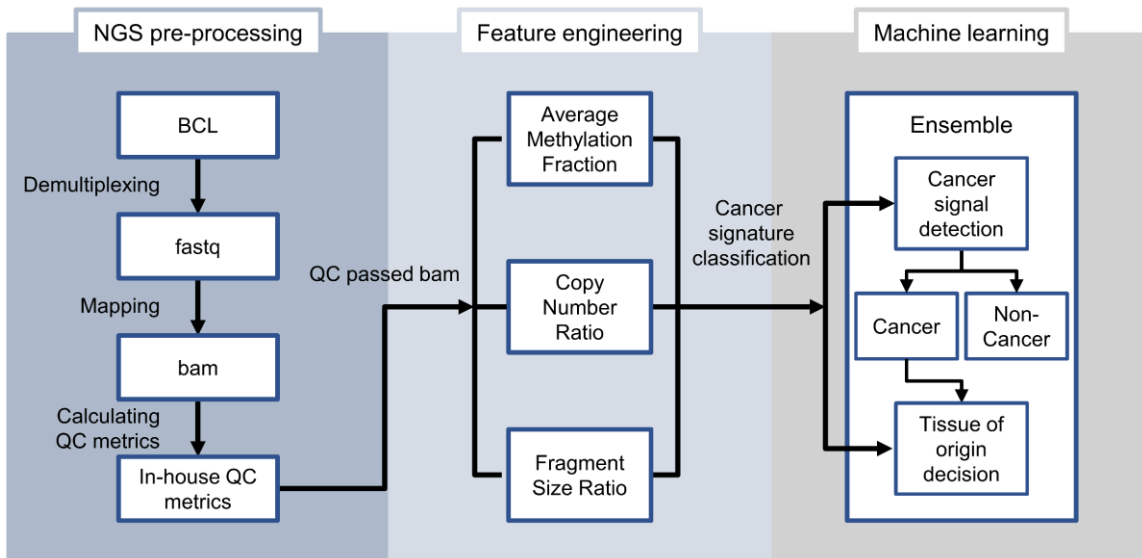

32

33 **Supplementary Fig. 2. AlphaLiquid® Screening analysis workflow.**

34 The workflow consisted of three procedures: next-generation sequencing (NGS) pre-processing,  
 35 feature engineering, and machine learning application. NGS pre-processing started with  
 36 demultiplexing, converting a bcl file to a fastq file, and then performing read mapping onto the  
 37 GRCh37 reference genome creating a bam file. Subsequently, in-house quality control (QC)  
 38 metrics were calculated. Next, the average methylation fraction, copy number ratio, and fragment  
 39 size ratio features were extracted from the bam file and fed to the cancer signature ensemble  
 40 model for cancer signal detection and to search for the tissue of origin.

41

42

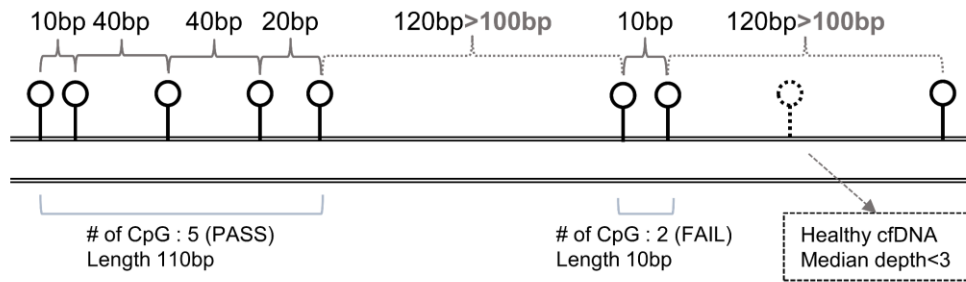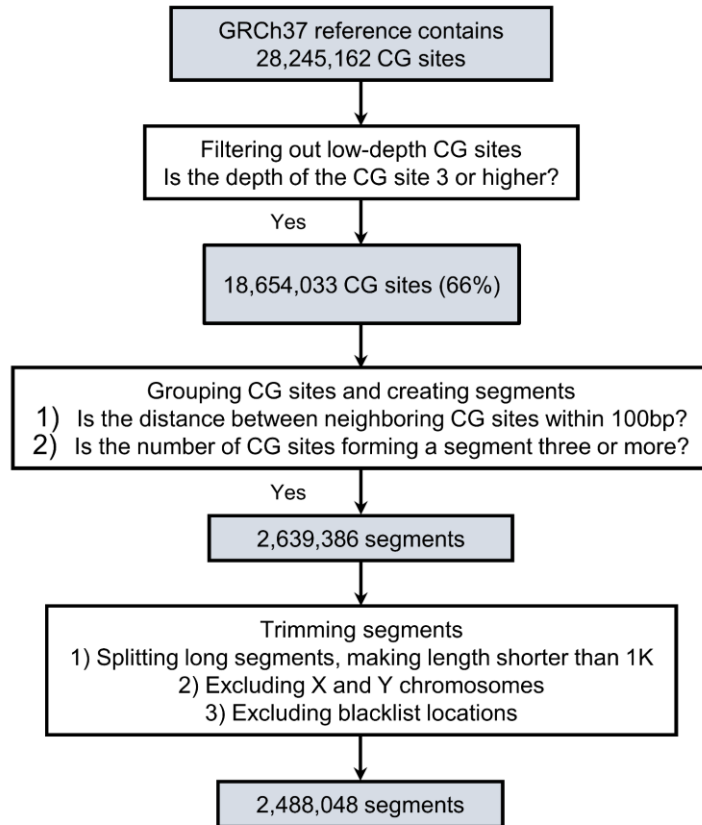

43

44 **Supplementary Fig. 3. Definition of methylation regions analyzed in this study.**

45 Starting from the ~30 million CpG sites in the GRCh37 reference genome, 2,488,048 methylation  
 46 regions were obtained for downstream analyses following the steps described in the flow chart.

47

48

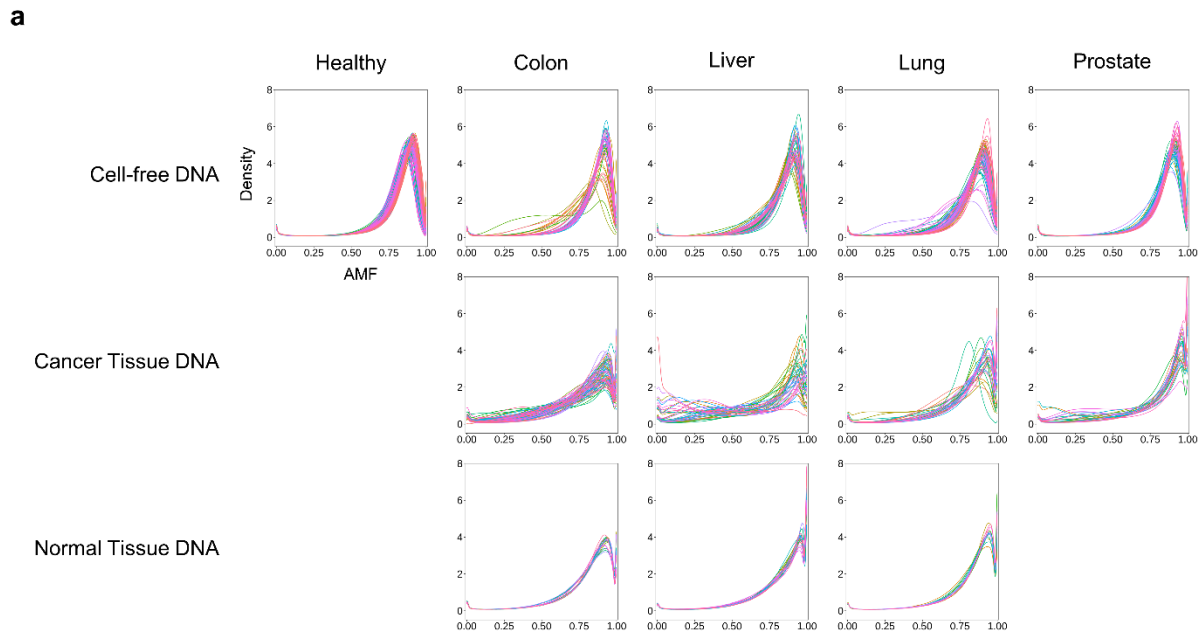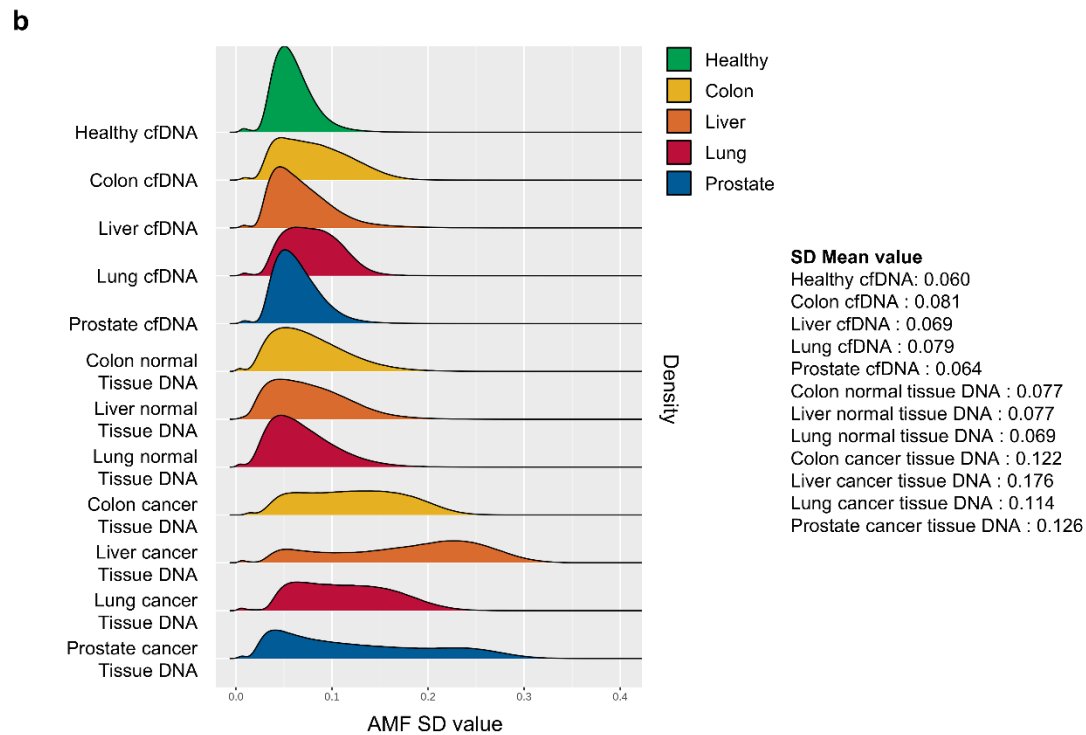

49

**Supplementary Fig. 4. Genome-wide distribution of the regional methylation level.**

(a) Density plot of the average methylation fraction (AMF) collected from ~2.4 million methylation regions per each sample (colored lines). Samples were grouped by sample type (row) and cohort type (column). (b) Genome-wide distribution of the standard deviation (SD) of the AMF value calculated at each methylation region. The mean of the SD of each group is listed on the right side.

50  
51  
52  
53  
54  
55

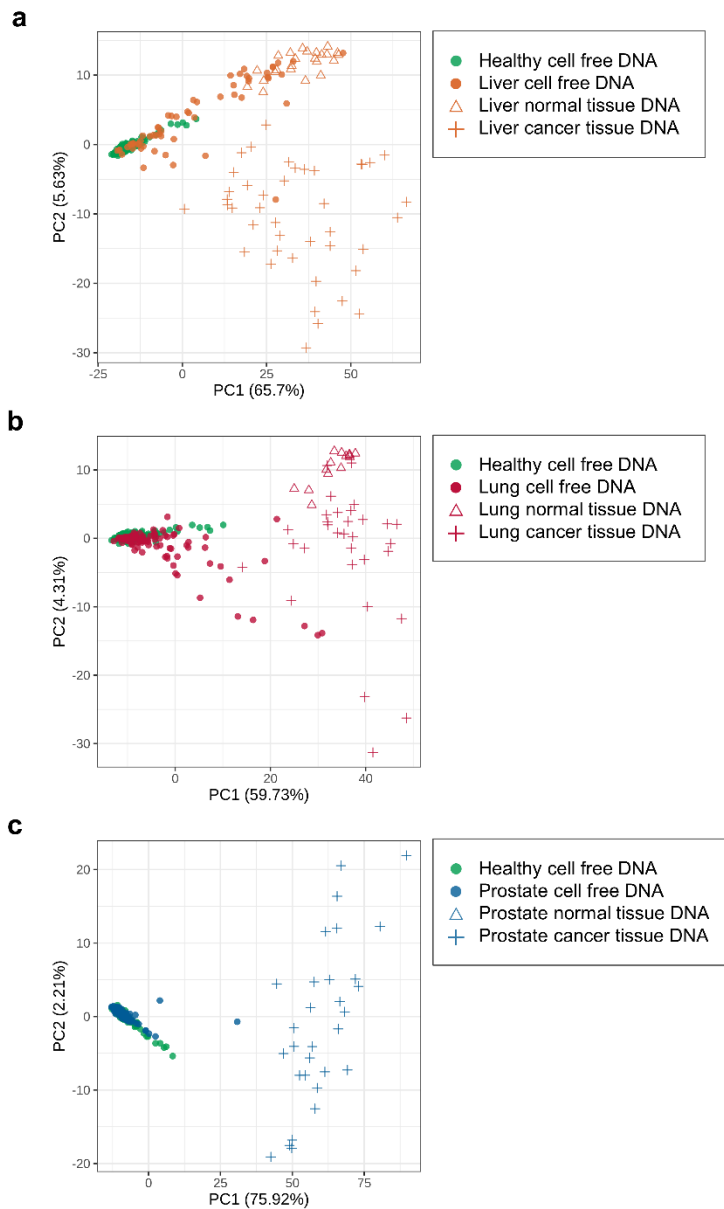

56

57 **Supplementary Fig. 5. Variation in the methylation level by sample type.**

58 Principal component analysis was performed on healthy cfDNA samples (green-filled circles) and  
 59 all sample types from hepatocellular carcinoma (a), lung cancer (b), and prostate cancer (c). The  
 60 average methylation fractions of ~67,000 regions with low methylation levels in the healthy  
 61 training set were used for the analysis.

62

63

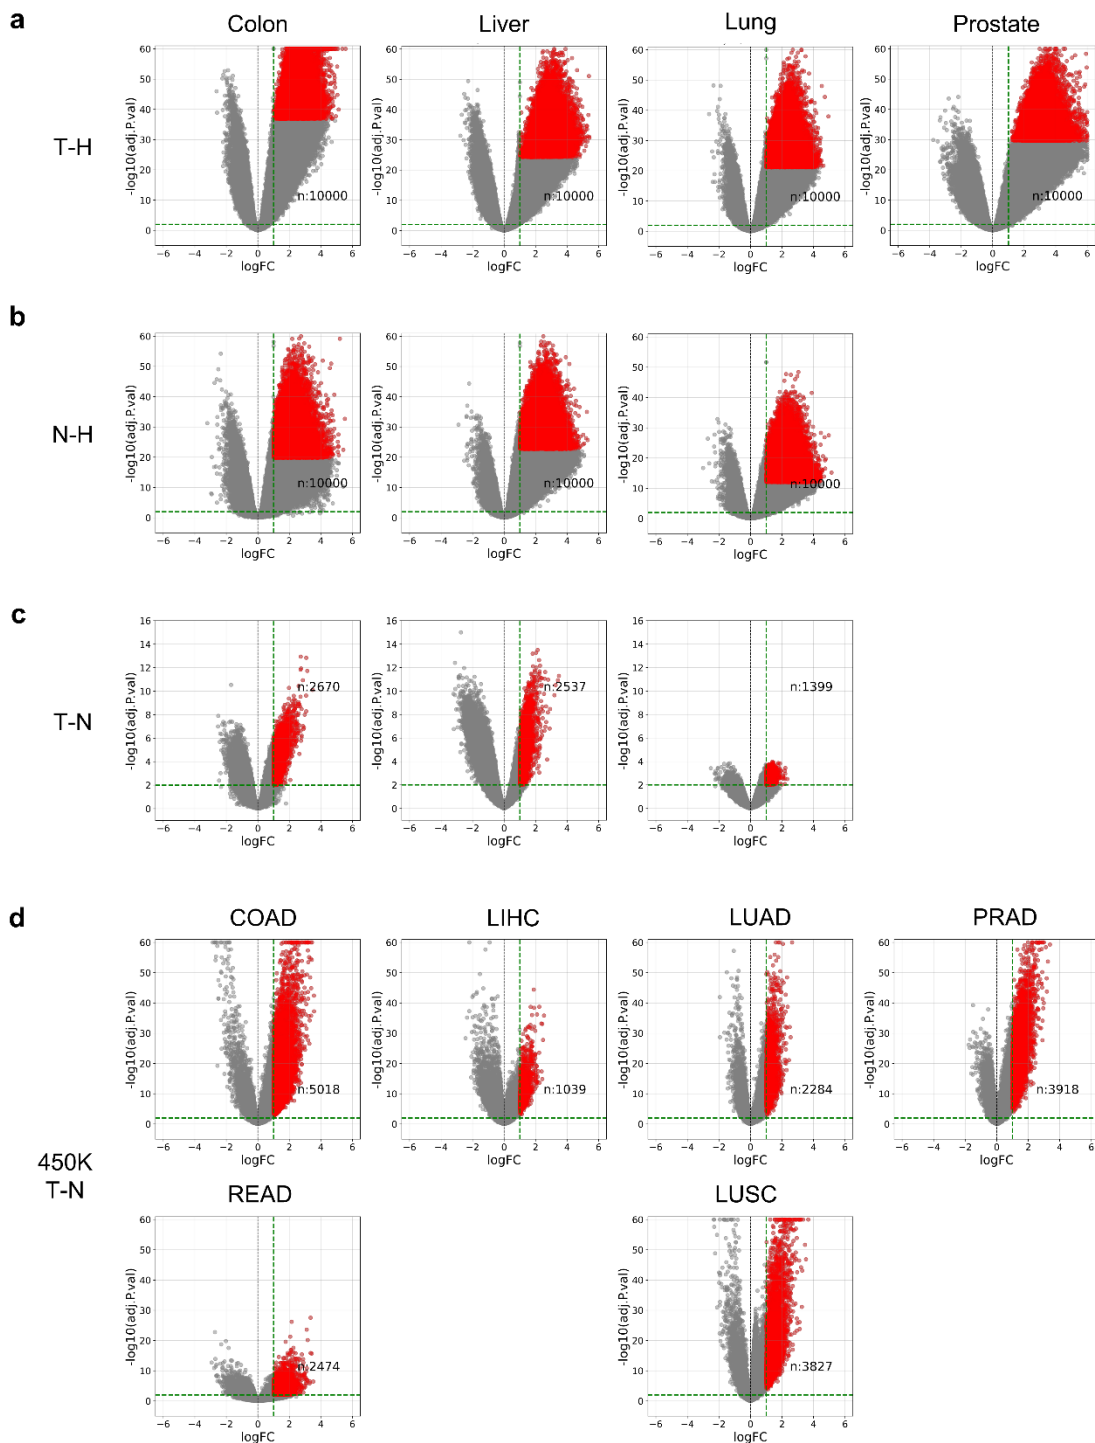

64

65 **Supplementary Fig. 6. Volcano plots indicating differentially methylated markers among**  
 66 **regions with low methylation in the healthy cohort.**

67 Differential methylation analyses were carried out using sequencing data and The Cancer  
 68 Genome Atlas 450K data for markers in the ‘healthy-unmethylated’ regions (for details, see  
 69 Materials and Methods). For the sequencing data, comparisons were performed between (a)  
 70 cancer tissue and healthy cfDNA (‘T-H’), (b) normal tissue and healthy cell-free DNA (‘N-H’),  
 71 and (c) cancer tissue and normal tissue (‘T-N’). For the 450K data (d), comparisons between  
 72 tumor and normal tissues (‘T-N’) were performed using the related cancer cohorts.

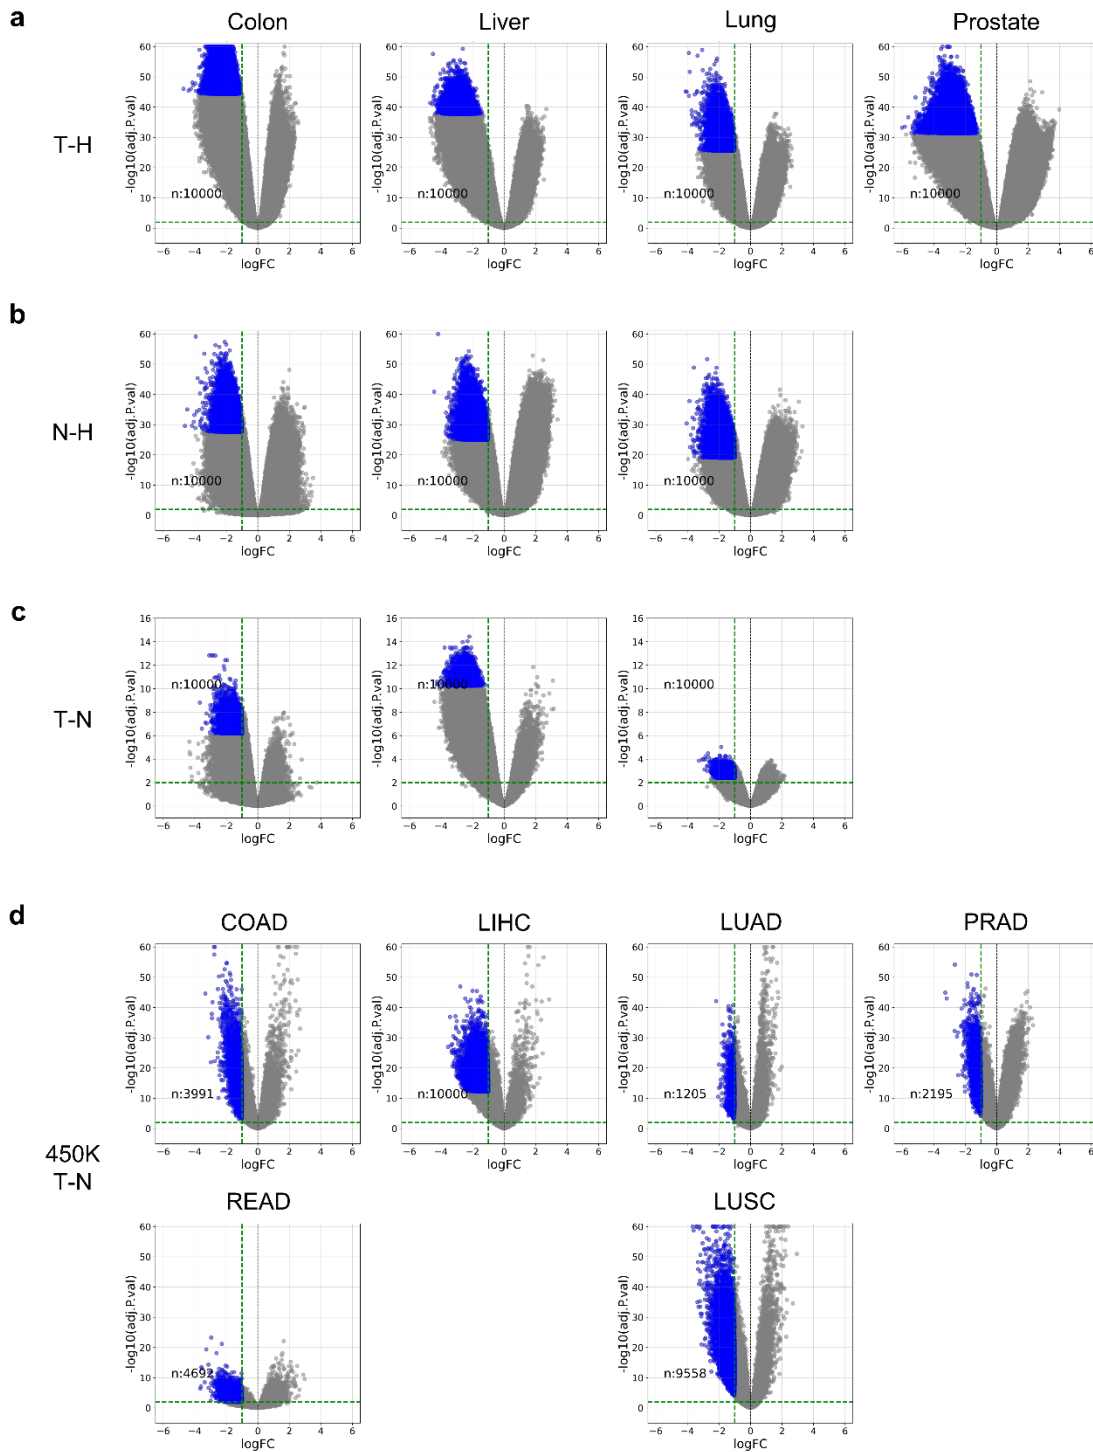

73

74 **Supplementary Fig. 7. Volcano plots indicating differentially methylated markers among**  
 75 **methylated regions in the healthy cohort.**

76 Differential methylation analyses were carried out using sequencing data and The Cancer  
 77 Genome Atlas 450K data for markers in the ‘healthy-methylated’ regions (for details, see  
 78 Materials and Methods). Other details are similar to those in Supplementary Fig. 6.  
 79



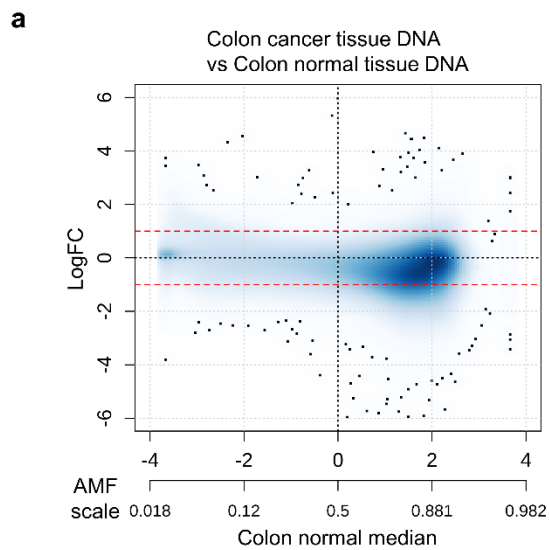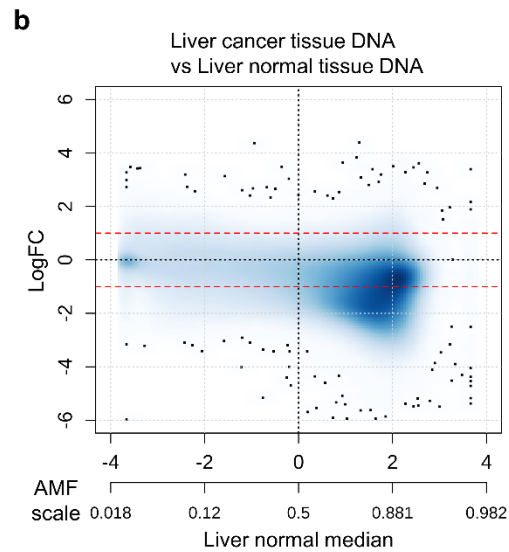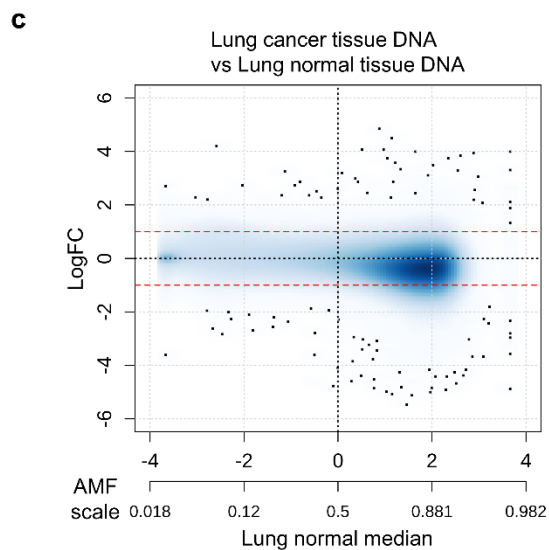

80

81 **Supplementary Fig. 8. Magnitude of differential methylation levels between cancer and**  
 82 **normal tissues.**

83 For each colon **(a)**, liver **(b)**, and lung **(c)** cancer type, a smoothed scatter plot shows the log fold  
 84 change according to the differential methylation analysis between the cancer tissues and the  
 85 normal tissues, along with the median methylation level in the normal cohort.

86

87

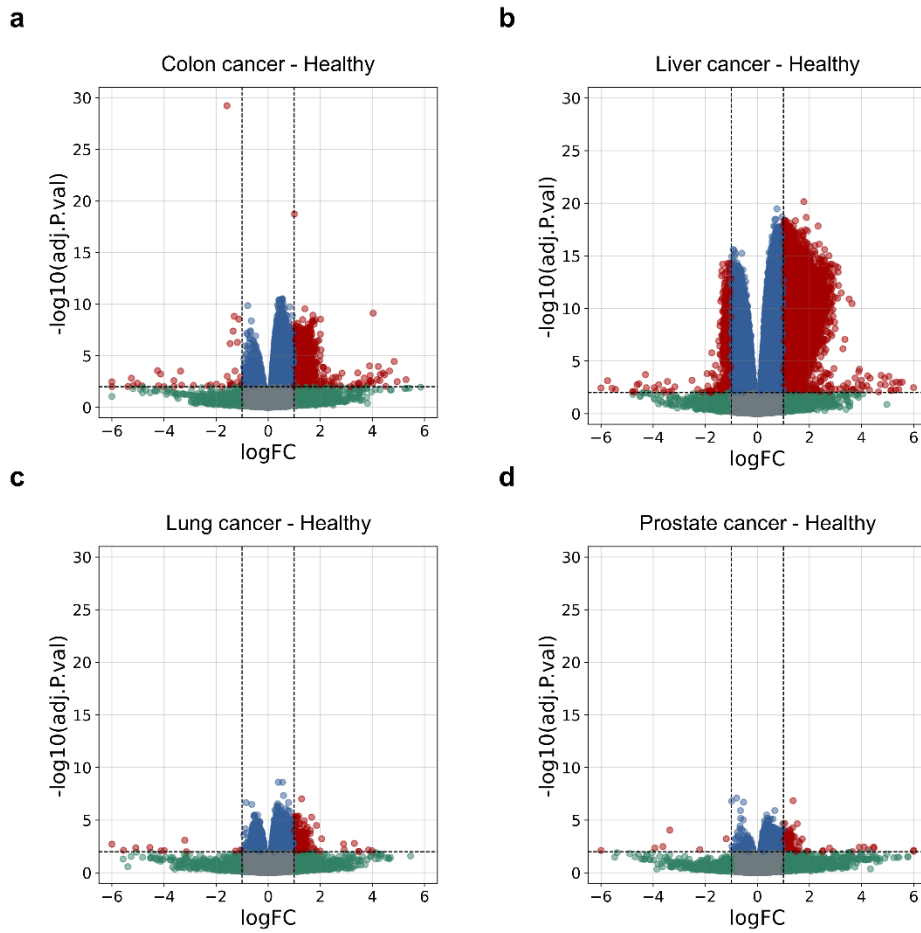

88

89 **Supplementary Fig. 9. Differential methylation analysis using cell-free DNA (cfDNA) only.**

90 For each colon (**a**), liver (**b**), lung (**c**), and prostate (**d**) cancer type, a differential methylation  
 91 analysis was conducted comparing the associated cancer cfDNA samples with the healthy  
 92 cfDNAs. Each volcano plot demonstrates the  $-\log_{10}$  (false discovery rate-adjusted  $p$ -value)  
 93 against the log fold change.  
 94

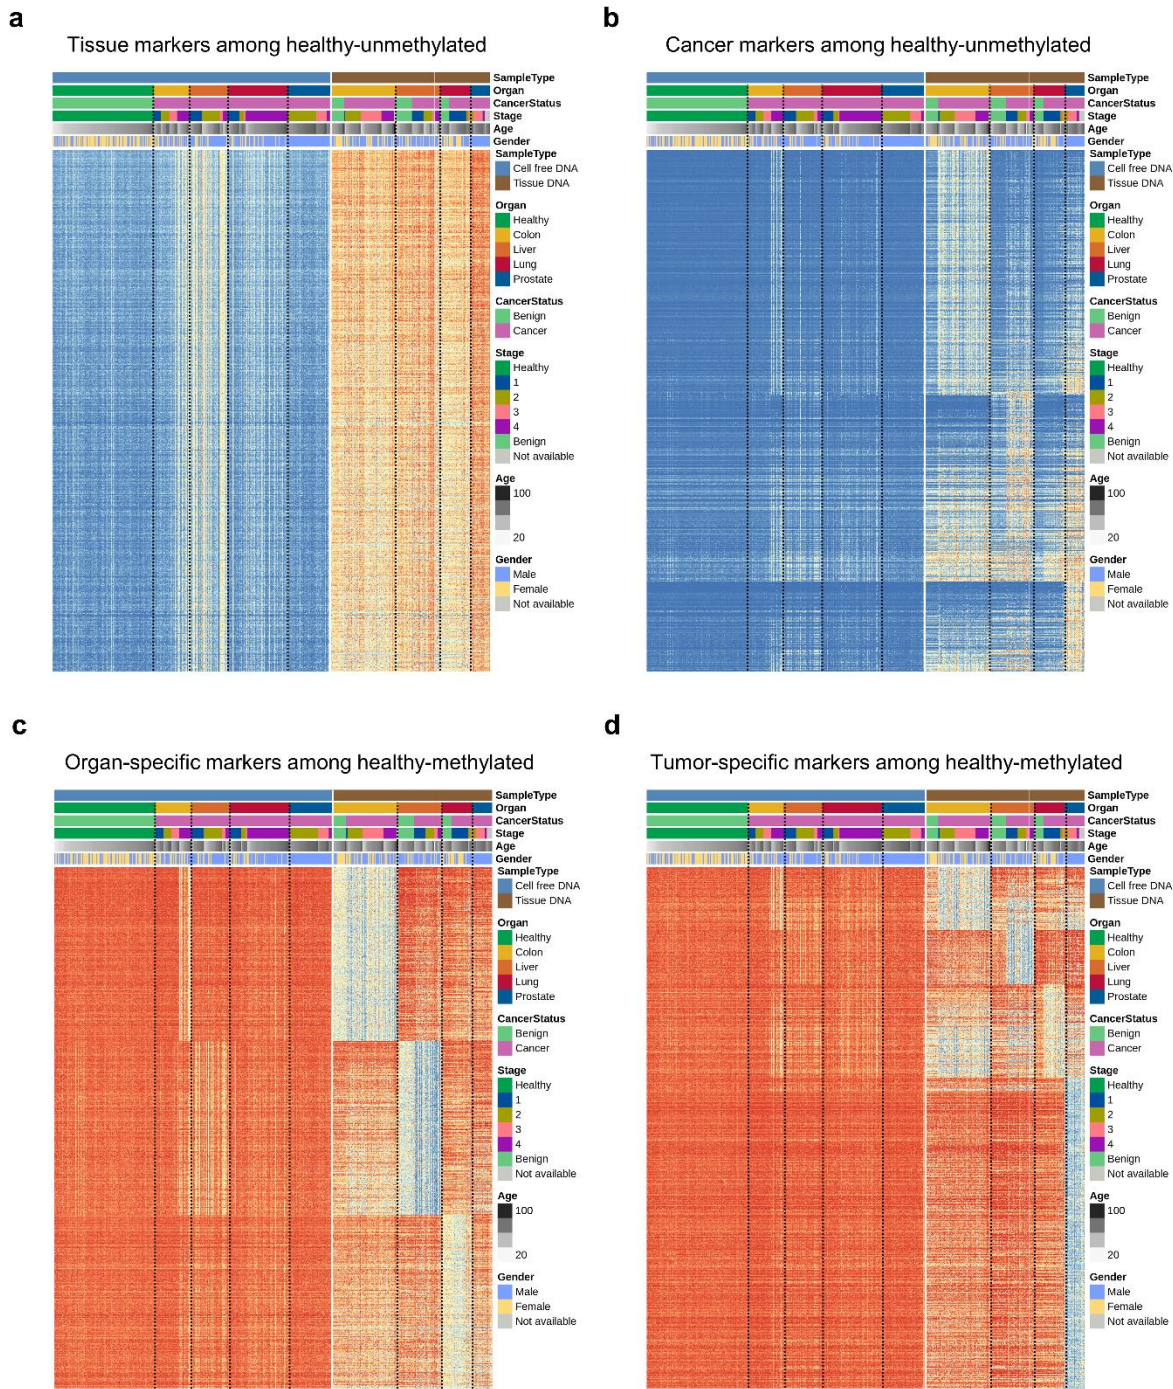

95

96 **Supplementary Fig. 10. Heatmap visualizing methylation markers that reveal cancer**  
 97 **signatures or tissue signatures.**

98 **(a)** and **(b)** Differentially methylated markers between cell-free DNA and tissues **(a)** and between  
 99 normal tissue and cancer tissues **(b)** among those in the ‘healthy-unmethylated’ regions. **(c)** and  
 100 **(d)** Differentially methylated markers across organ-specific tissues **(c)** and between normal tissue  
 101 and cancer tissue within each organ type **(d)** among those in the ‘healthy-methylated’ regions. For  
 102 more details on marker selection, see Materials and Methods. The graphical details are similar to  
 103 those of Fig. 3c.

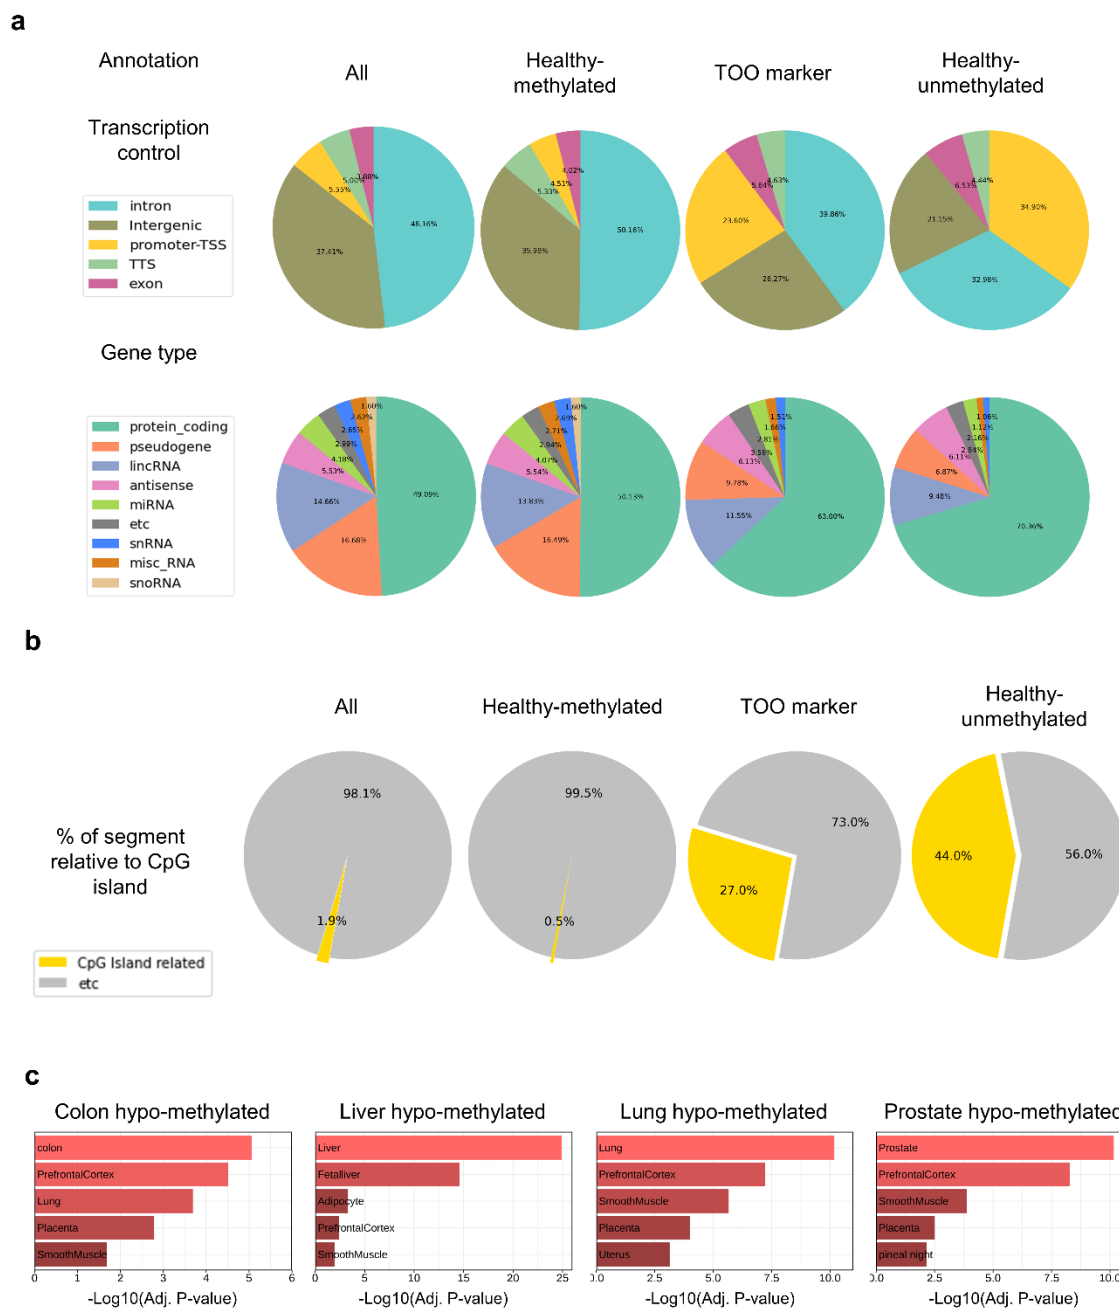

104

105 **Supplementary Fig. 11. Characterization of biological functions of the methylation markers**  
 106 **used for cancer detection and localization.**

107 **(a)** Transcriptional (upper) or gene type (lower) categories were annotated and are shown as pie  
 108 charts for all ~2.5 million methylation regions ('All'), 'healthy-methylated' regions, regions used  
 109 for tissue of origin classification, and 'healthy-unmethylated' regions. For details of the region  
 110 definition, see Materials and Methods. **(b)** Percentage of overlapping base pairs with CpG islands  
 111 for the four regions analyzed in **(a)**. **(c)** Gene set analysis of the 'cell type' category for the  
 112 cancer-hypo markers specific to each organ (y-axis).  
 113

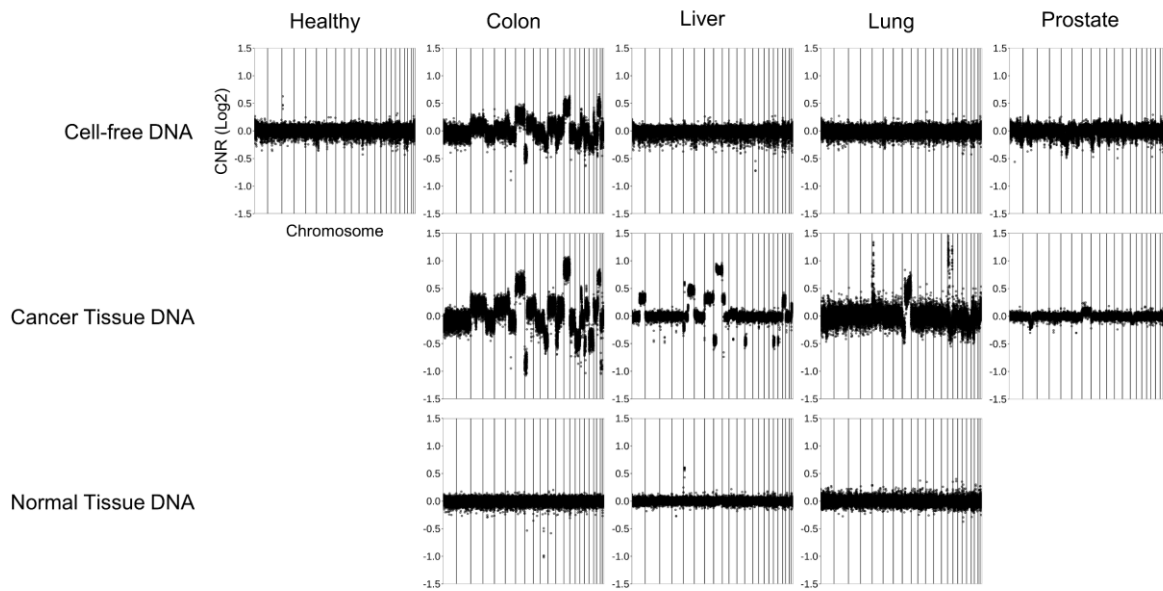

114

115 **Supplementary Fig. 12. Genome-wide copy number patterns at the individual sample level.**

116 The copy number ratio (CNR) profile is shown along the genomic coordinates for cell-free DNA  
 117 (cfDNA) or tissue samples. Each black point indicates the log<sub>2</sub>-transformed CNR value computed  
 118 for a 100-kb bin. The gray vertical lines separate chromosomes. For colon, liver, and lung  
 119 samples, the cfDNA, cancer tissue DNA, and normal tissue DNA samples were obtained from a  
 120 matched donor.  
 121



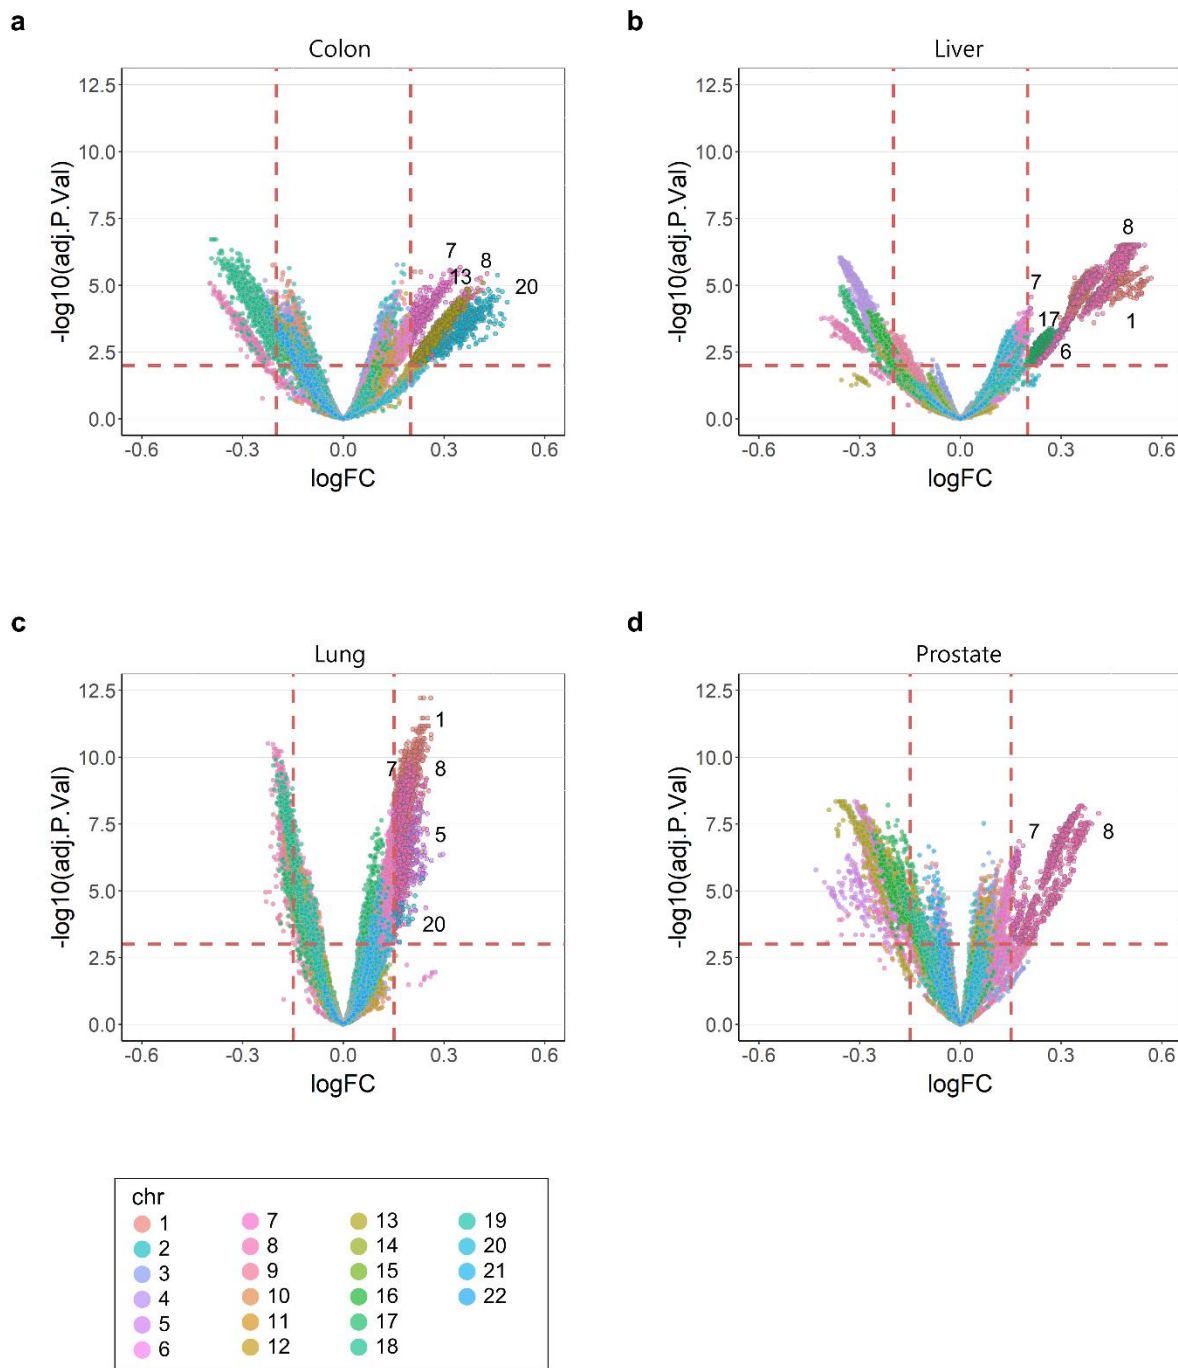

122

123 **Supplementary Fig. 13. Differential copy number ratio analysis between cancer tissues and**  
 124 **normal tissues using whole-genome methylation sequencing data.**

125 For each colon **(a)**, liver **(b)**, lung **(c)**, and prostate **(d)** cancer, a volcano plot shows the results of  
 126 differential copy number ratio (CNR) analysis (performed in log<sub>2</sub> scale) comparing cancer tissues  
 127 with normal tissues. Each CNR value calculated per 100-kb bin (one point) is colored according  
 128 to the associated chromosome. Because large copy number events are often much longer than 100  
 129 kb, clusters of neighboring bins were observed. The chromosome numbers of repeated copy  
 130 number gain events are indicated with black text.

131

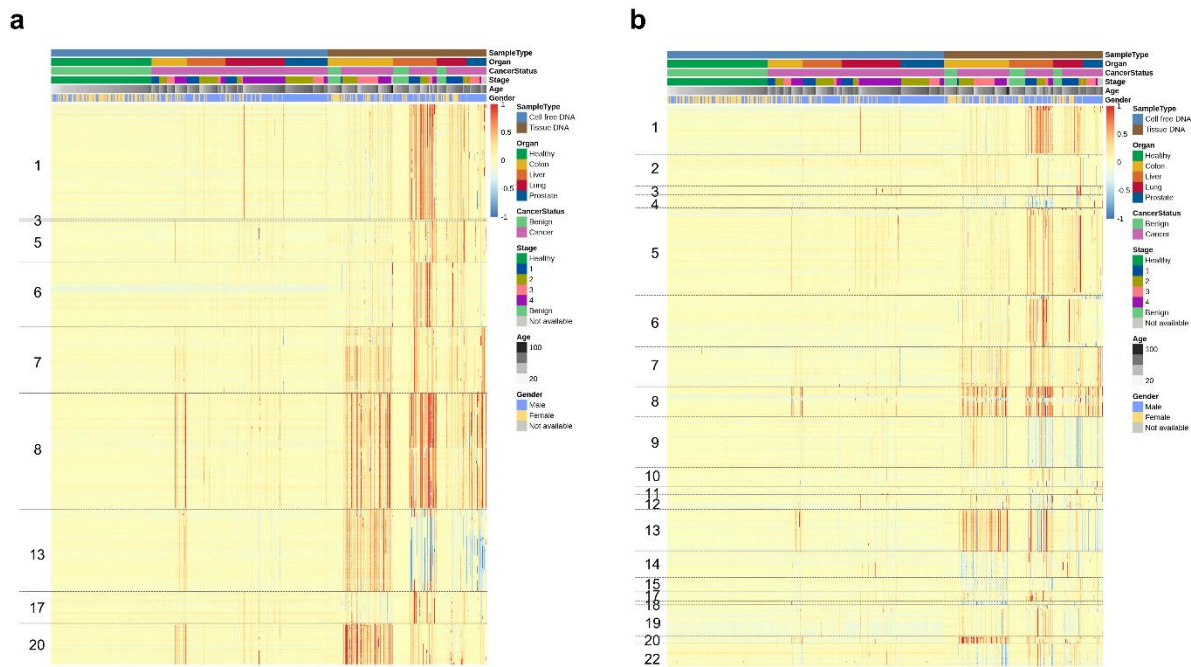

132

133 **Supplementary Fig. 14. Heatmap visualizing log<sub>2</sub>-scale copy number ratio (CNR) values of**  
 134 **our data for the copy number gain regions found by whole-genome methylation sequencing**  
 135 **(WGMS) data and by a pan-cancer study of The Cancer Genome Atlas (TCGA).**

136 The heatmap shows all training cell-free DNA and tissue samples for (a) the regions that showed  
 137 a significant increase in the CNR values in our WGMS cancer tissues compared with normal  
 138 tissues by any cancer type and (b) the regions that were reported by a pan-cancer study of TCGA  
 139 as having a frequent copy number gain event. The log<sub>2</sub>-scale CNR value is plotted for each  
 140 sample (columns) and genomic bin (rows). Sample annotations are shown on the upper part,  
 141 similar to those in Fig. 3c, and the horizontal gray lines indicate separate chromosomes.

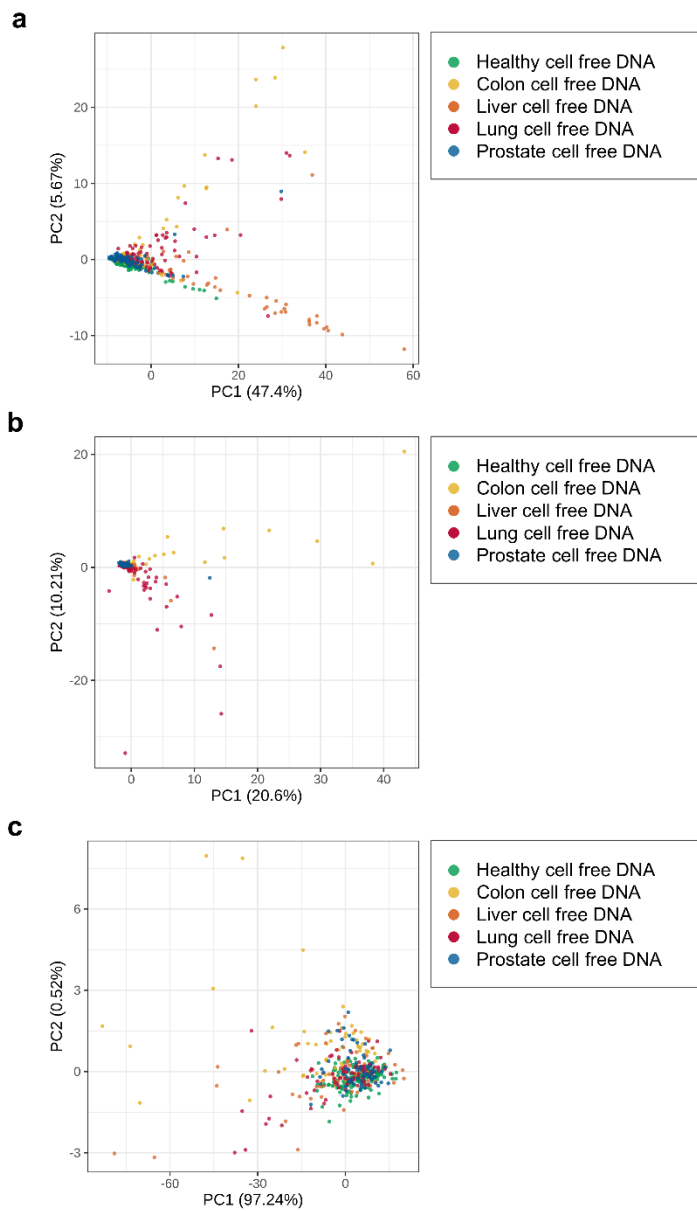

142

143 **Supplementary Fig. 15. Unsupervised clustering analysis using cell-free DNA (cfDNA)**  
 144 **samples only.**

145 Principal component analysis of all cfDNA samples using the average methylated fraction (AMF)  
 146 **(a)**, copy number ratio (CNR) **(b)**, and fragment size ratio (FSR) **(c)** features. For the AMF,  
 147 ~67,000 regions with low methylation levels in the healthy training set were used. For the CNR  
 148 and FSR, values were computed over non-overlapping 100-kb bins.  
 149



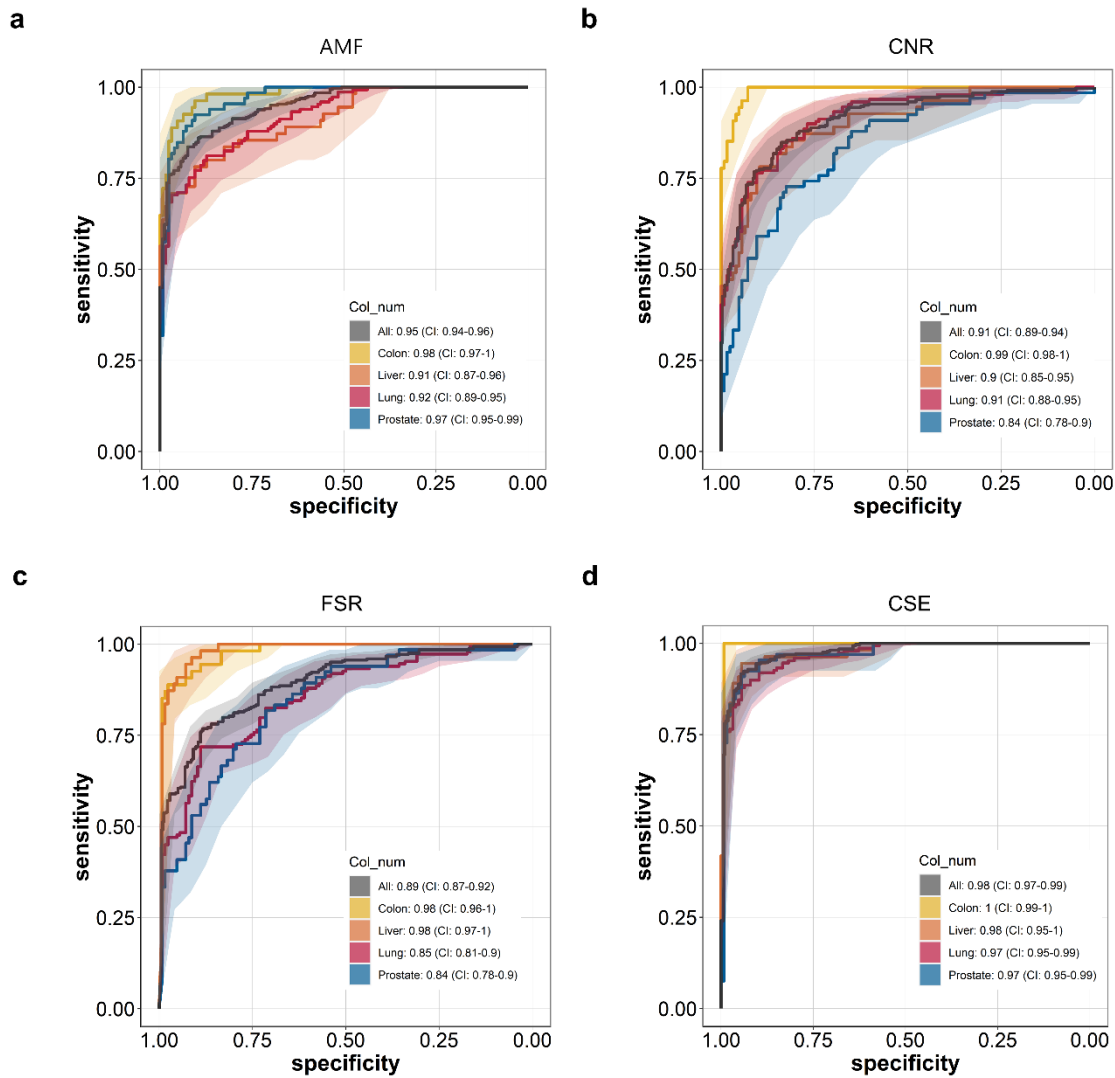

150

151 **Supplementary Fig. 16. Receiver operating characteristic (ROC) curves for cancer detection**  
 152 **classifiers.**

153 ROC curves are shown for each cancer detection classifier, including the average methylated  
 154 fraction (AMF) (a), copy number ratio (CNR) (b), fragment size ratio (FSR) (c), and cancer  
 155 signature ensemble (CSE) (d), computed using all samples (black line) or including one cancer  
 156 type at a time with healthy controls (colored line). The area under the curve and 95% confidence  
 157 interval (CI) are shown in the lower right part of each panel.  
 158

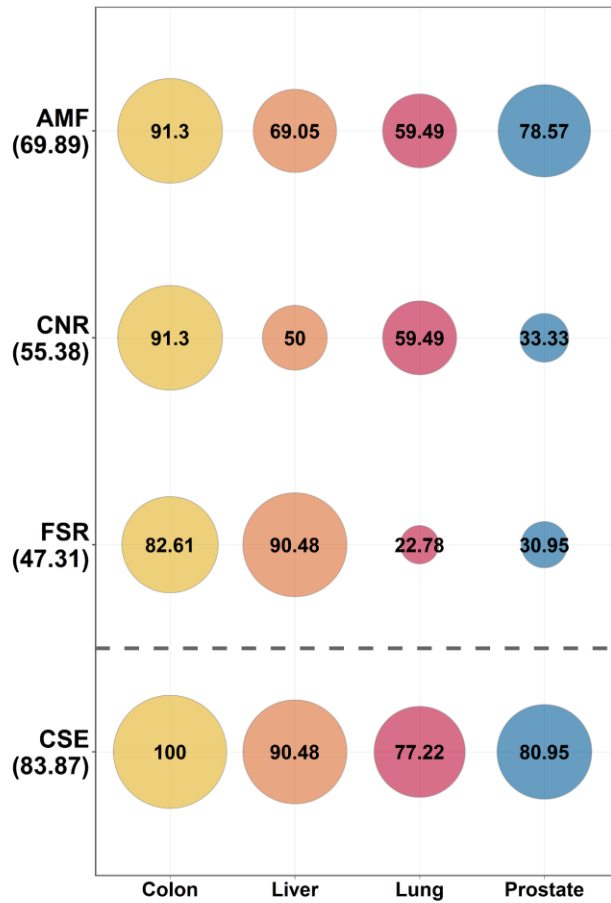

159

160 **Supplementary Fig. 17. Sensitivity of cancer detection classifiers at 95.2% specificity for**  
 161 **stage 1 and 2 cancer patients.**

162 The sensitivity for stage 1 and stage 2 cancer patients was calculated for each cancer type  
 163 (columns) by each classifier (rows). The other graphical details are similar to those in Fig. 6.  
 164

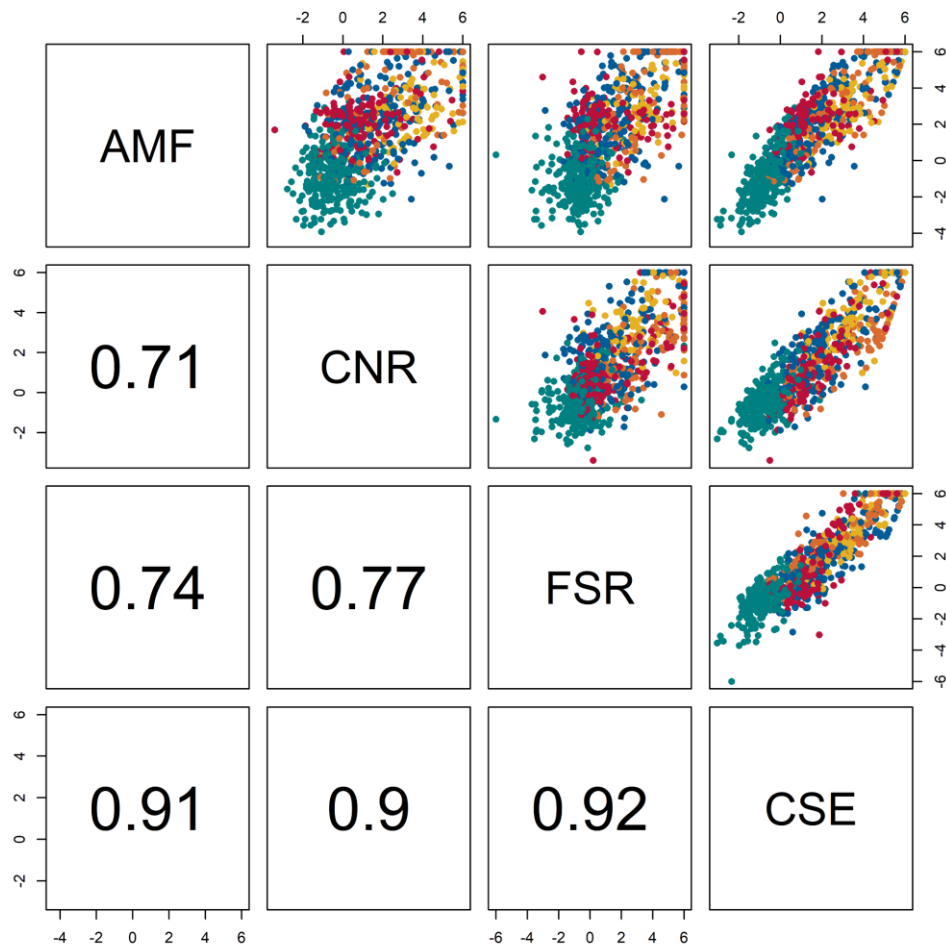

165

166 **Supplementary Fig. 18. Correlation among the cancer detection classifier scores.**

167 A pairwise correlation plot between cancer detection classifiers was constructed. The classifier  
 168 name is shown in diagonal blocks; the upper part includes the scatterplot, and the lower part  
 169 shows the Pearson correlation coefficient. Each sample is colored according to the cohort type:  
 170 green, healthy; yellow, colon; orange, liver; red, lung; and blue, prostate cancer.  
 171

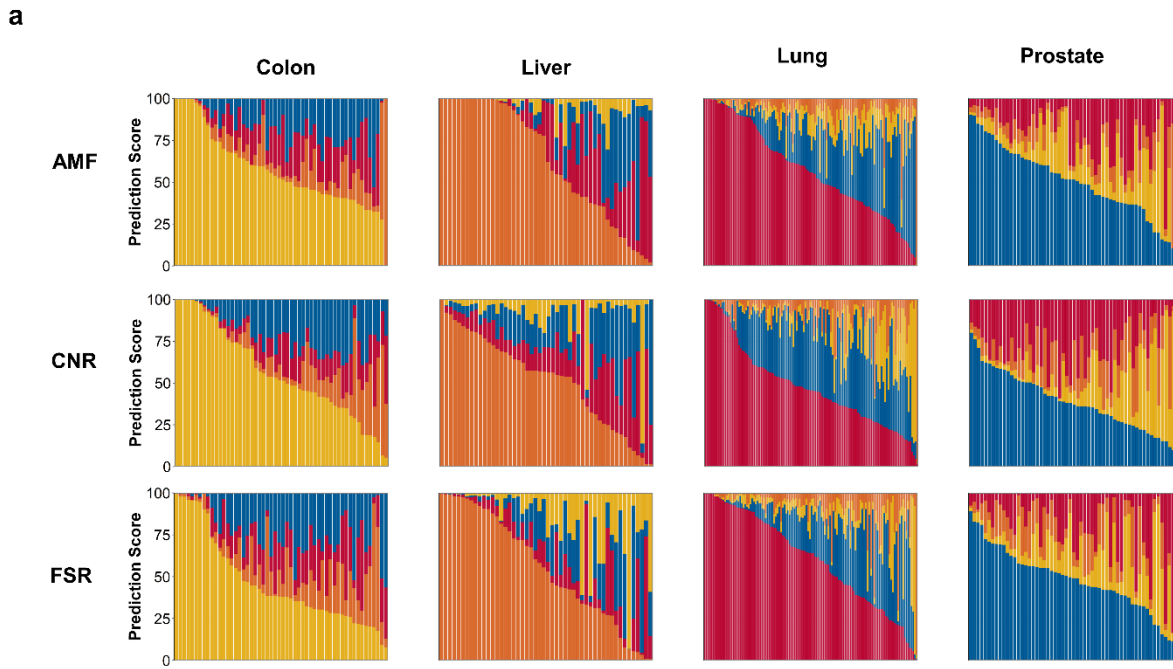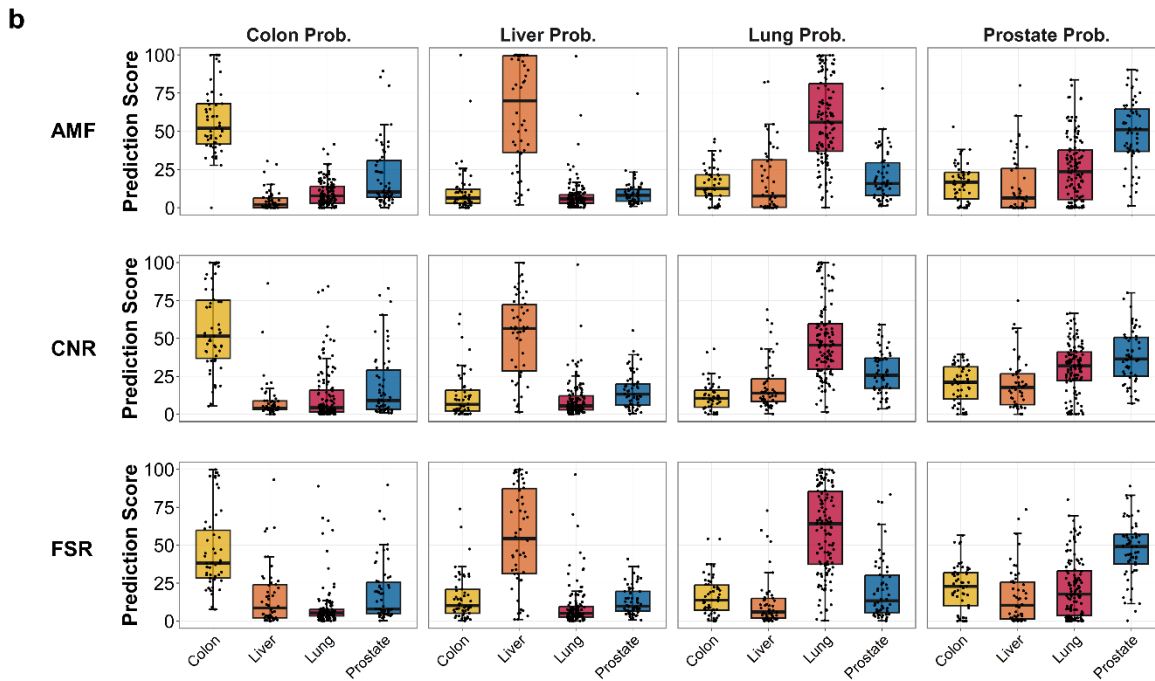

**Supplementary Fig. 19. Distribution of the tissue of origin (TOO) conditional probability.**

(a) Stacked bar plot visualizing the conditional probability decomposition in each sample by average methylated fraction (AMF), copy number ratio (CNR), and fragment size ratio (FSR) TOO classifiers (rows) across the four cancer types (columns). (b) Boxplots showing each organ-supporting probability (titled in each panel) across the four cancer cohorts (x-axis).

a

|                |          |              |  |
|----------------|----------|--------------|--|
| ID             |          | Name         |  |
| Specimen       | Specimen | Institution  |  |
| Collector Date |          | Department   |  |
| Receipt Date   |          | Phone number |  |

  

**Positive**

The CancerFind test detected genetic/epigenetic alteration signals associated with cancer in the analyzed cfDNA acquired from the patient's blood sample. **[Positive]**

Based on the features of the genetic alterations, the predicted probabilities for the primary site of cancer origin are 80% and 10% for the colon and lungs, respectively.

**❖ Results Interpretation and recommendation**

- The CancerFind is a precise multi-cancer screening assay that utilizes next-generation sequencing to detect trace amount of cancer related genes derived from cancer cell into bloodstream. This assay identifies cancer associated methylation patterns, copy number variant(CNV) patterns, and fragmentomic patterns.
- Based on the observed methylation, CNV, and fragmentomics patterns, CancerFind provides conditional probabilities for the primary origin of cancer among eight possible sites.
- This assay has shown results with 95% specificity, 82% sensitivity, and 78% accuracy in predicting the primary site of origin, as demonstrated in clinical trials. All results should be interpreted and consulted with a clinician.

b

|                |          |              |  |
|----------------|----------|--------------|--|
| ID             |          | Name         |  |
| Specimen       | Specimen | Institution  |  |
| Collector Date |          | Department   |  |
| Receipt Date   |          | Phone number |  |

  

**Negative**

The CancerFind test do not detected genetic/epigenetic alteration signals associated with cancer in the analyzed cfDNA acquired from the patient's blood sample. **[Negative]**

**❖ Results Interpretation and recommendation**

- The CancerFind is a precise multi-cancer screening assay that utilizes next-generation sequencing to detect trace amount of cancer related genes derived from cancer cell into bloodstream. This assay identifies cancer associated methylation patterns, copy number variant(CNV) patterns, and fragmentomic patterns.
- Based on the observed methylation, CNV, and fragmentomics patterns, CancerFind provides conditional probabilities for the primary origin of cancer among eight possible sites.
- This assay has shown results with 95% specificity, 82% sensitivity, and 78% accuracy in predicting the primary site of origin, as demonstrated in clinical trials. All results should be interpreted and consulted with a clinician.

180

181 **Supplementary Fig. 20. Draft version of AlphaLiquid® Screening platform report example.**  
 182 The report presents the positive/negative outcomes determined by the CSE model and the tissue-  
 183 of-origin. Additionally, it encompasses a comprehensive interpretation of these findings  
 184 accompanied by pertinent recommendations. (a) and (b) illustrate examples of a positive case and  
 185 a negative case, respectively.

186

187
